# Supplementary material for: Black Rice Anthocyanidins Regulates Gut Microbiota and Alleviates Related Symptoms through PI3K/AKT Pathway in Type 2 Diabetic Rats
Source: Hindawi journal article supplement (doi:10.1155/2023/5876706), 2023-02-21
Supplement: f1 [file 5876706.f1.doc]

**Supplementary material**

**TABLE S1** Feed formulation for rats.

| Maintenance feed | | High-fat and high-sugar diet | |
| --- | --- | --- | --- |
| Corn | 28% | Maintenance feed | 66.5% |
| Flour | 20% | Lard | 10% |
| Wheat bran | 15% | Sucrose | 20% |
| Rice bran meal | 11% | Cholesterol | 2.5% |
| Soybean meal | 6% | Sodium cholate | 1% |
| Protein Powder | 7% |  |  |
| Fish meal | 8% |  |  |
| Pre-mixed feeds | 5% |  |  |

**TABLE S2** PCR primer sequences.

| Genes |  | Sequences (5'to3') |
| --- | --- | --- |
| PI3K | Forward | AGATCGCTCTGGCCTCATTG |
| Reverse | AGCCAGTTCAGAAGGGCATC |
| AKT | Forward | TCAAAGAAGTCAAAGGGGCTGC |
| Reverse | CTCCTTCACAATAGCCACGTC |
| AMPK | Forward | TGAGAAGCAGAAGCACGACG |
| Reverse | TTCTCCAATCTTCACTTTGCCG |
| ACC | Forward | GGAGTAGTTGCTGTAGAAACCCG |
| Reverse | CATTAGAGGTAGCCCTTCACGG |
| CPT1 | Forward | CACAACATCCTGTCCACCAG |
| Reverse | GCAGCCTATCCAGTCATCGT |

**
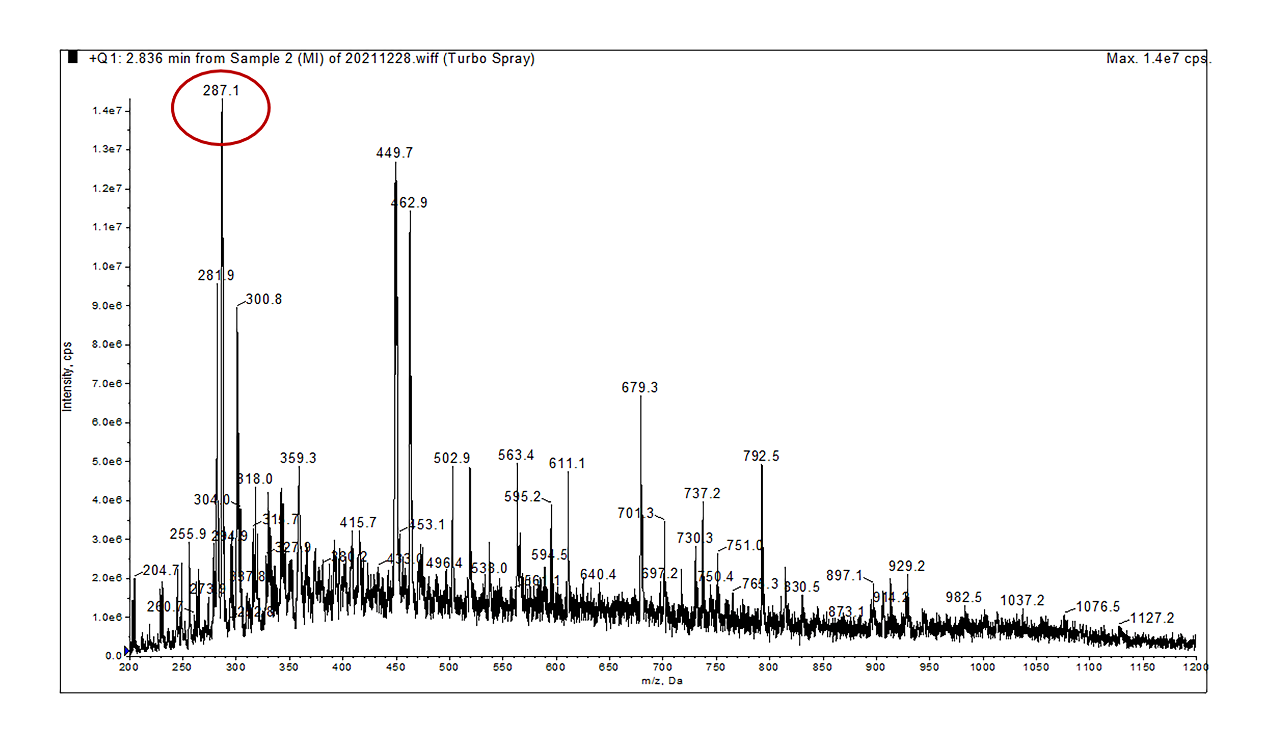
**

**FIGURE S1** HPLC-MS atlas of total anthocyanin content in black rice.
